# Supplementary figures and images for: Identification of Early-Onset Metastasis in SF3B1 Mutated Uveal Melanoma
Source: MDPI journal article supplement (doi:10.3390/cancers14030846), 2022-02-08

Gene-sets  
( $q \leq 0.05$ ; Hallmark and KEGG)

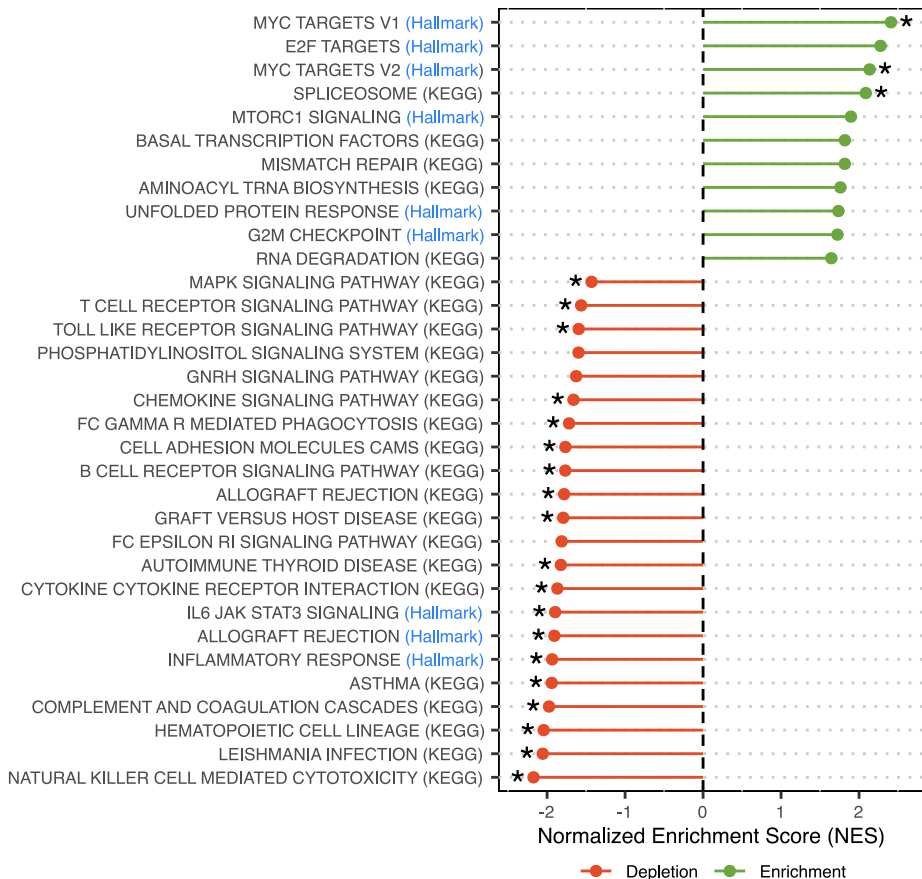

Supplement: s1 [file s1]

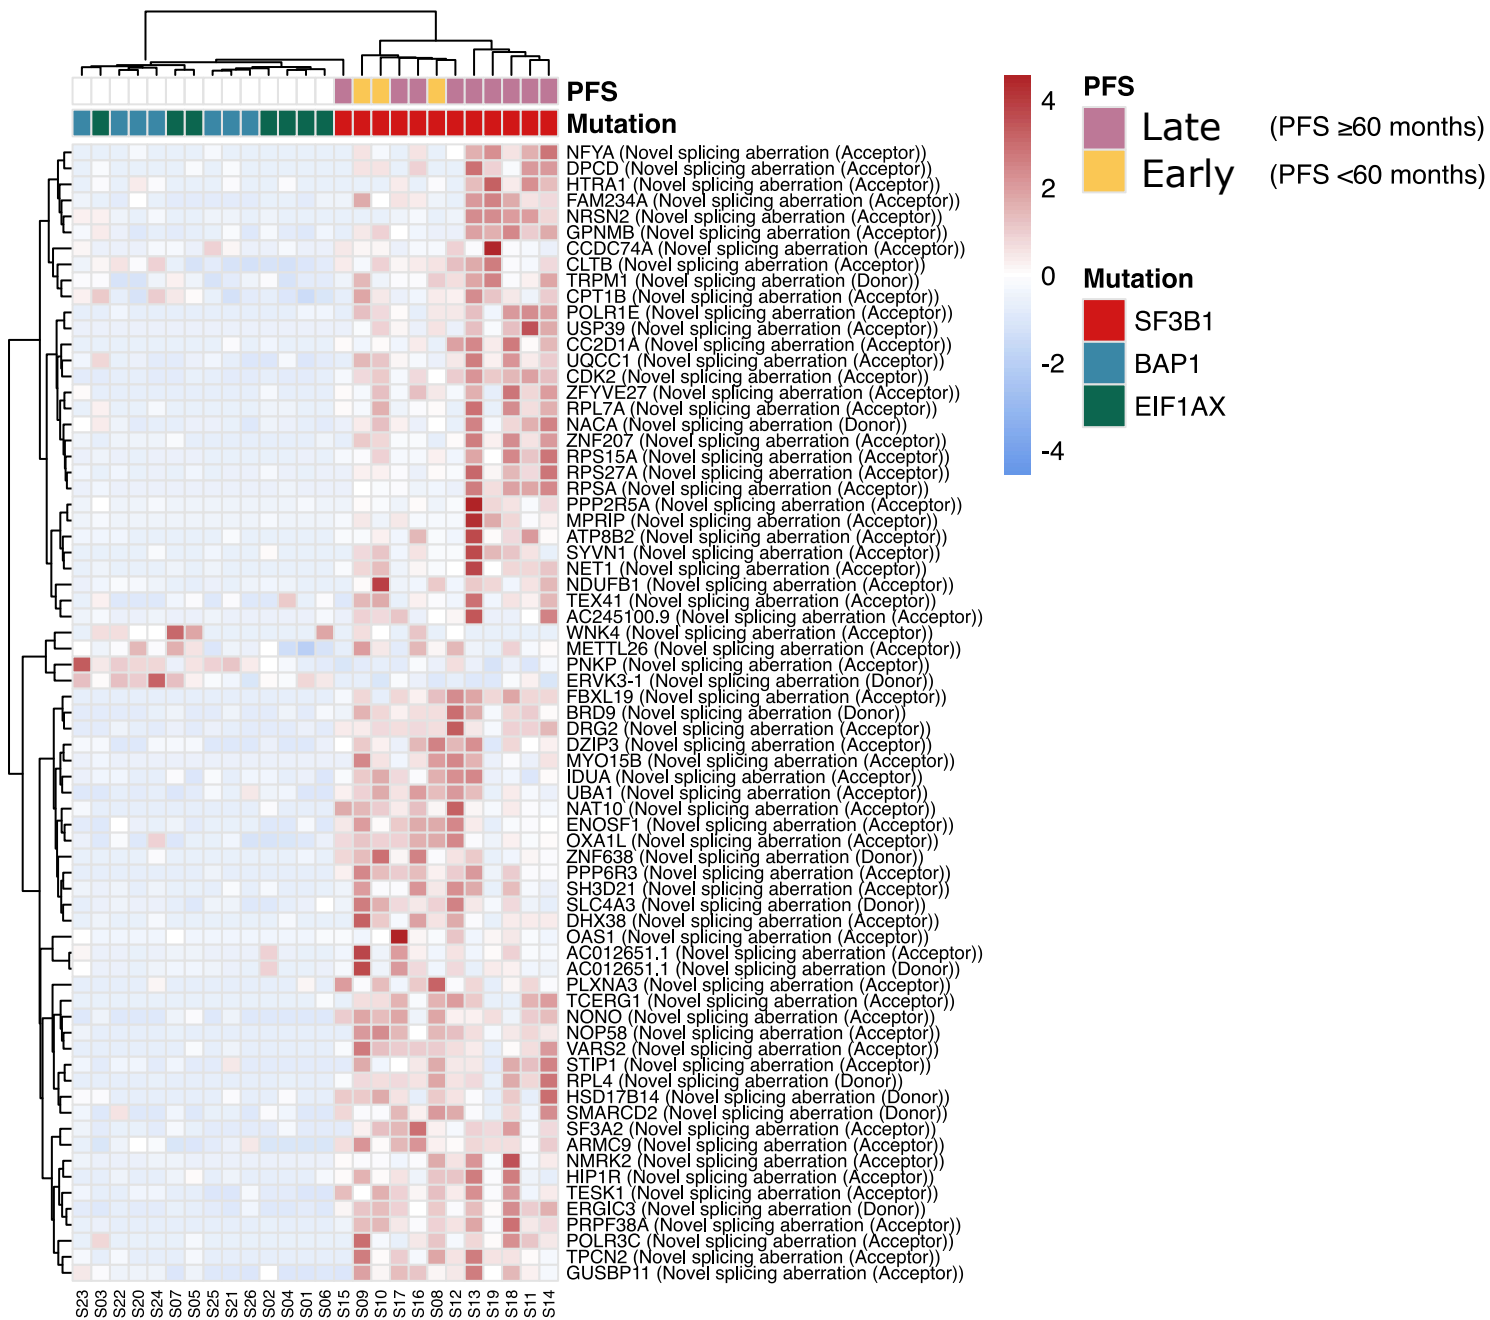

Supplement: s1 [file s1]

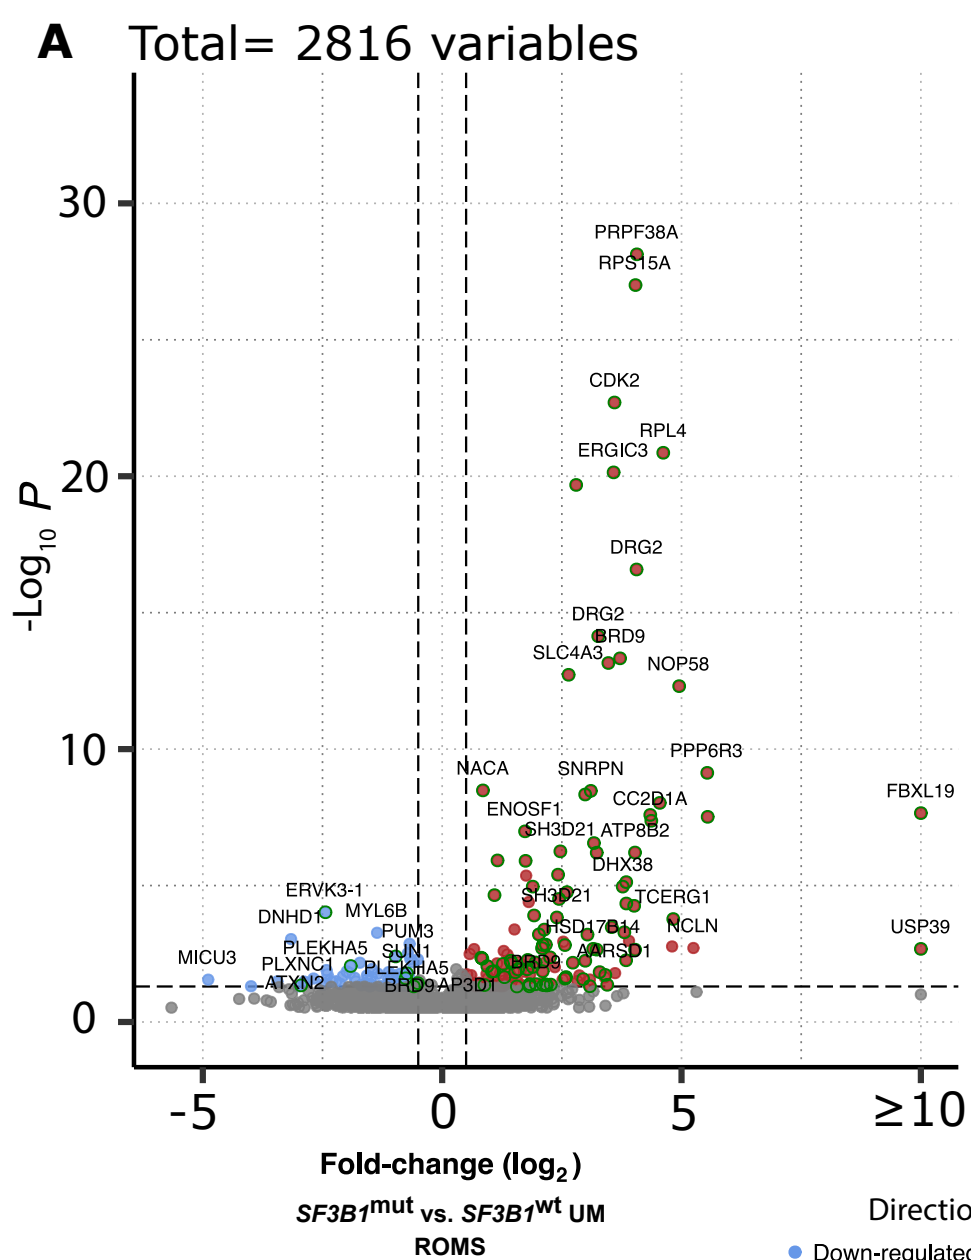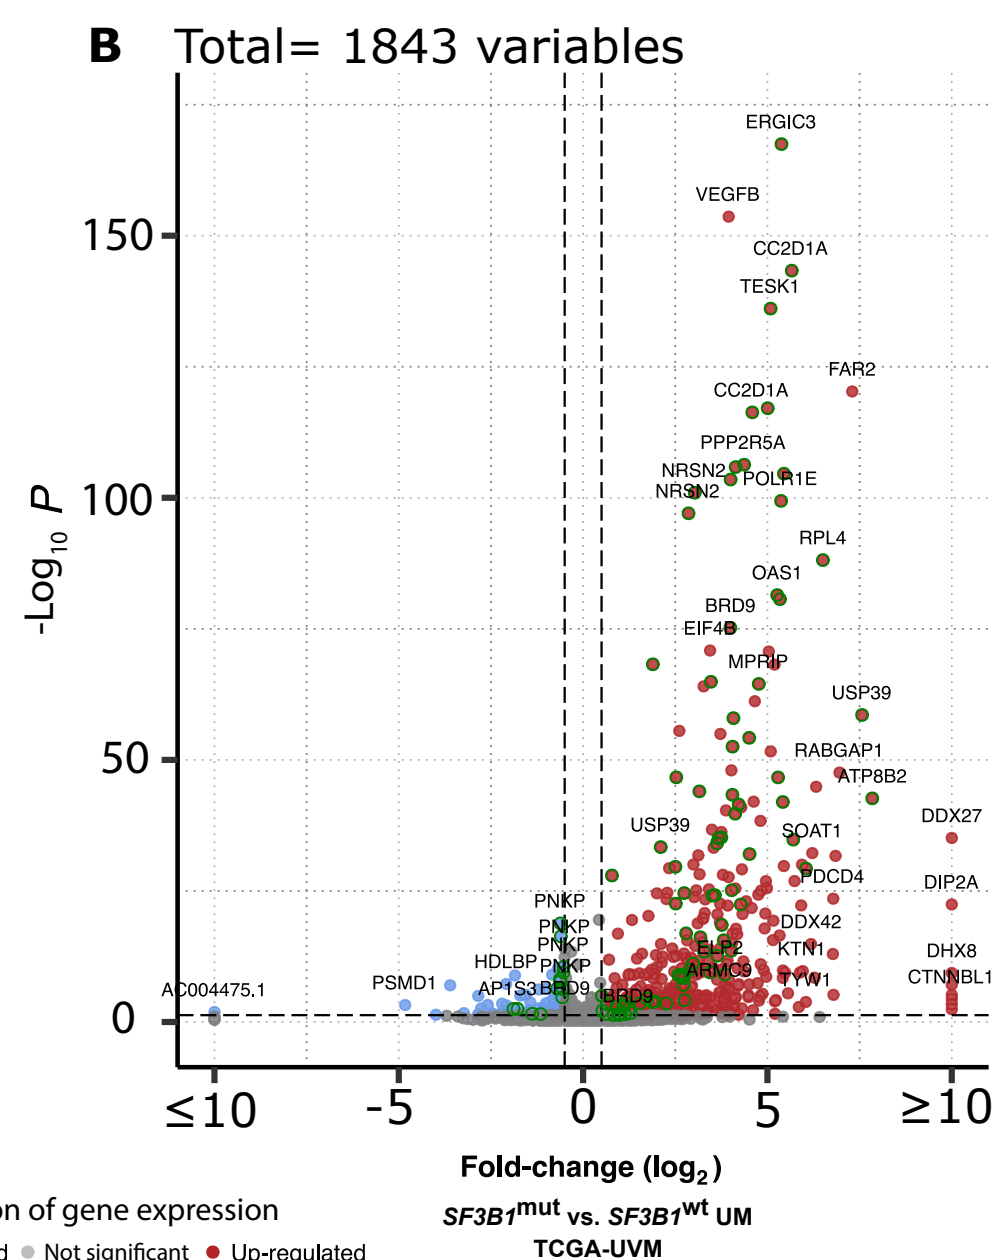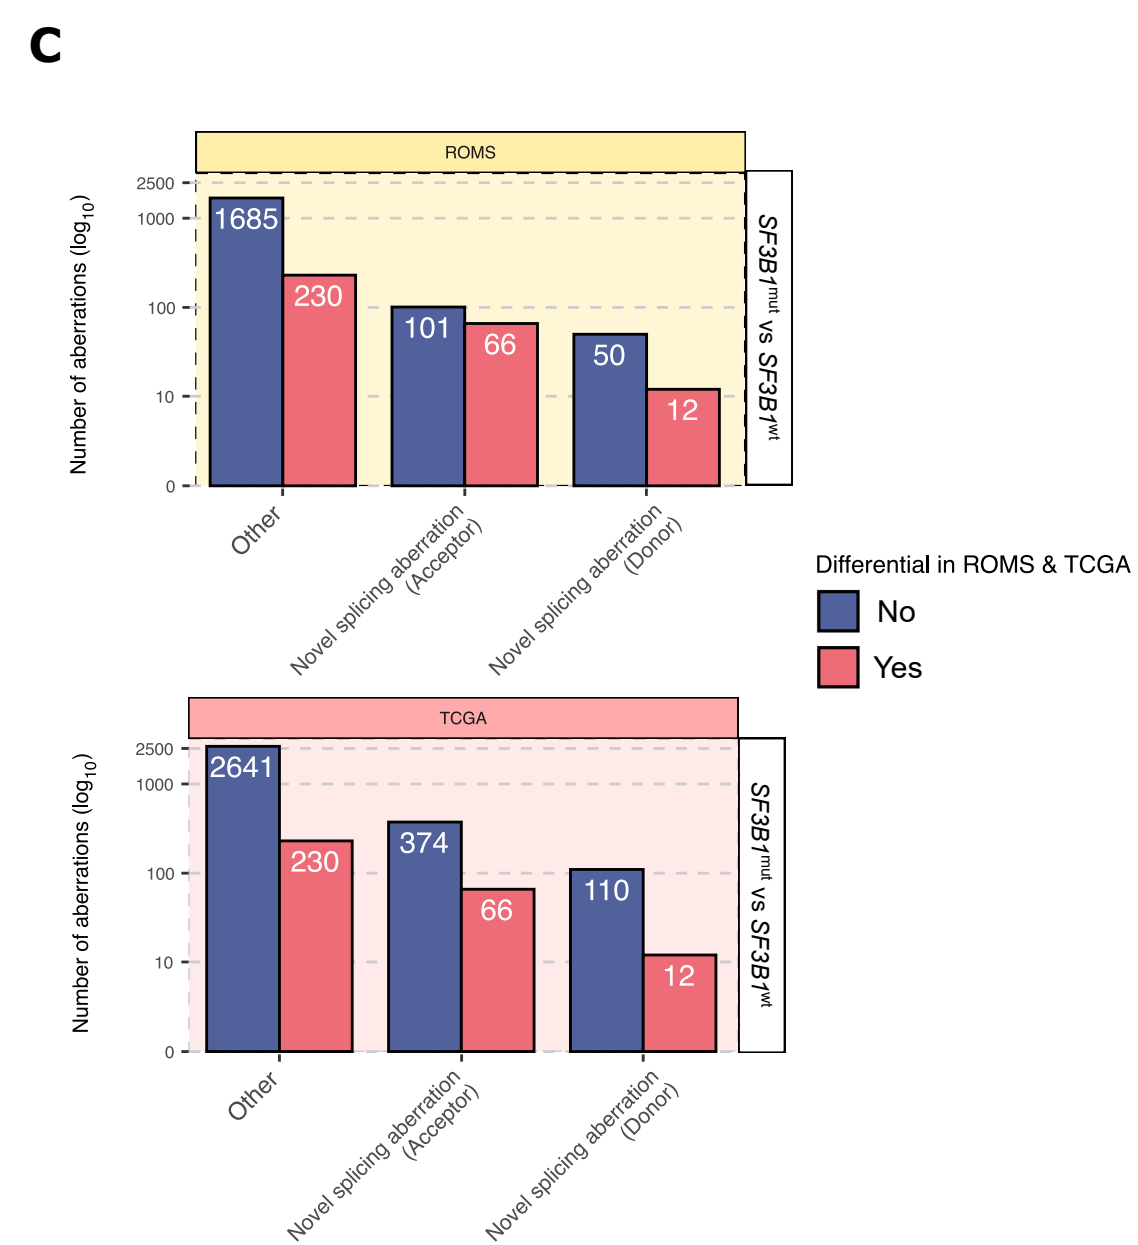

Supplement: s1 [file s1]

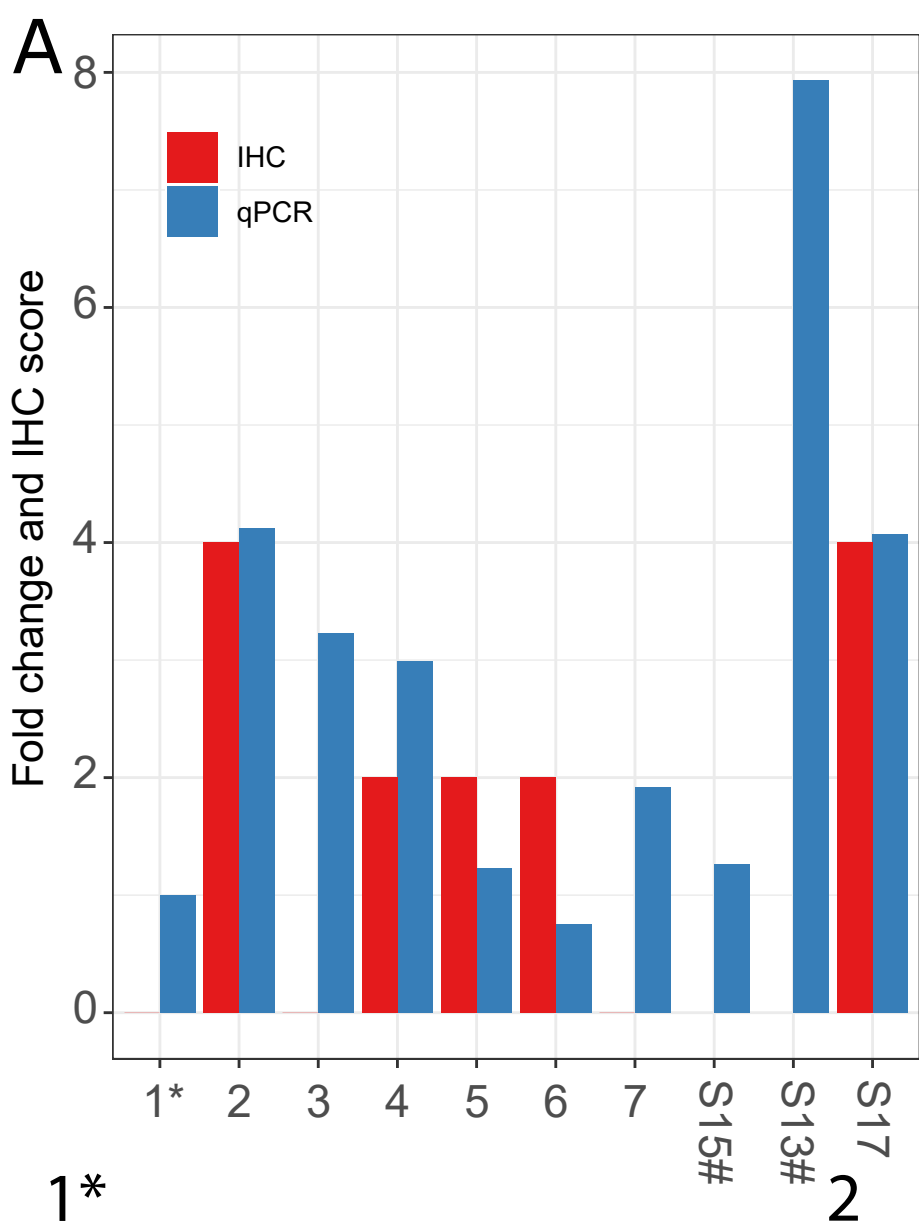

1\*

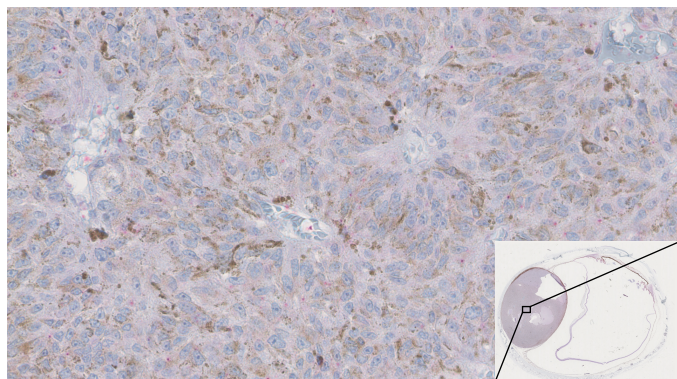

2

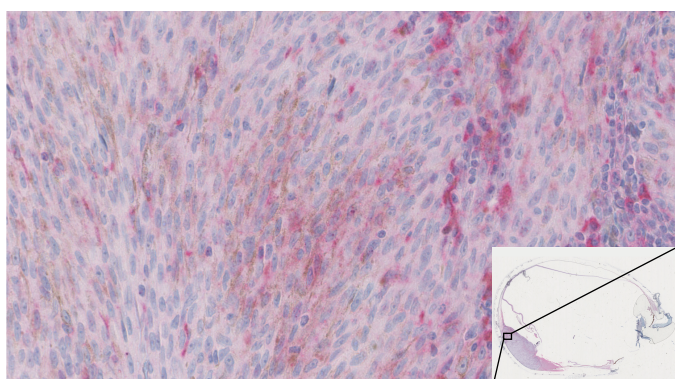

5

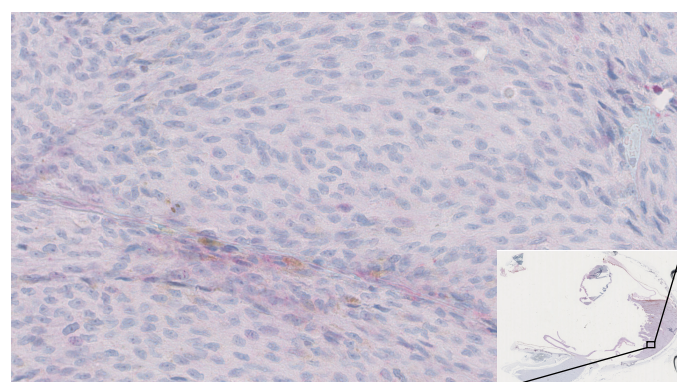

6

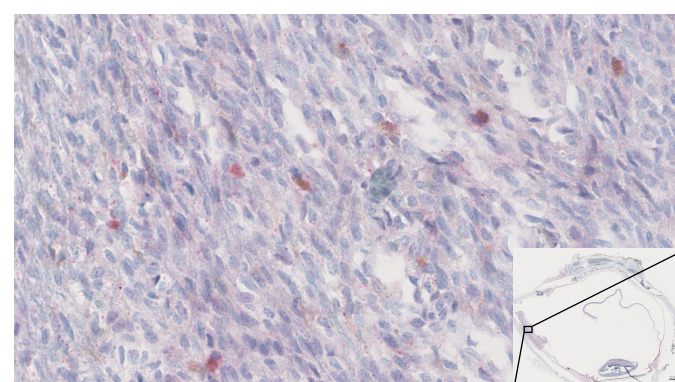

3

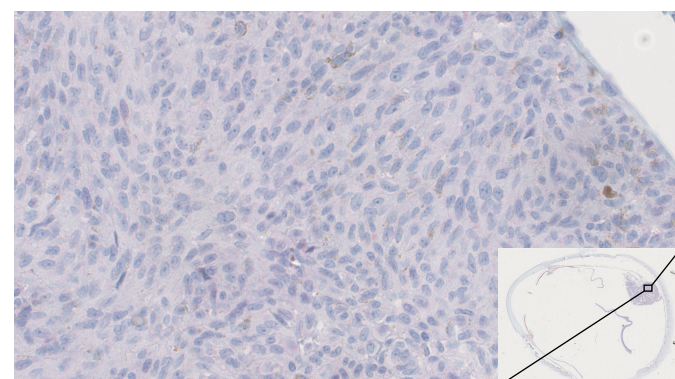

7

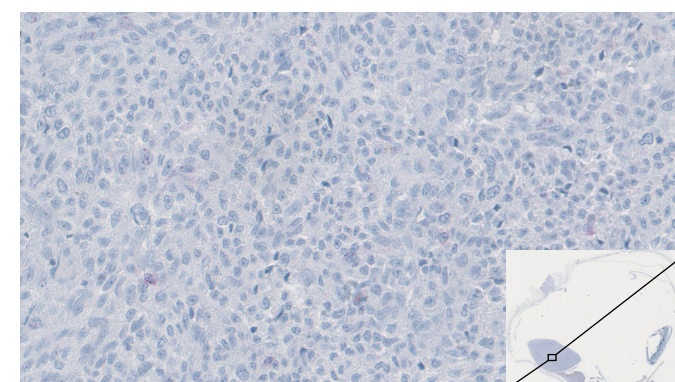

4

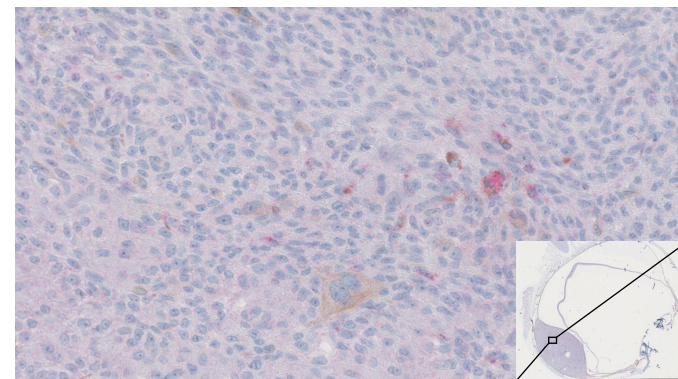

S17

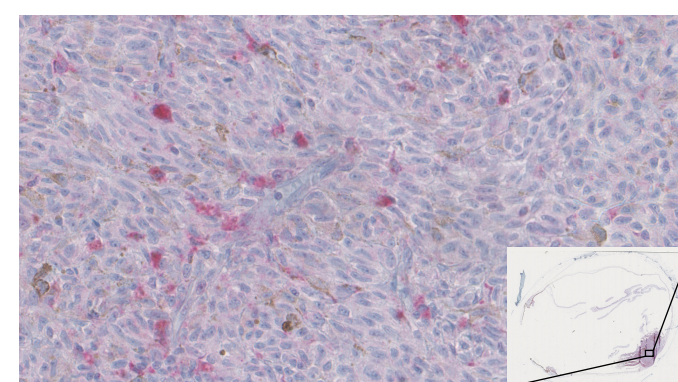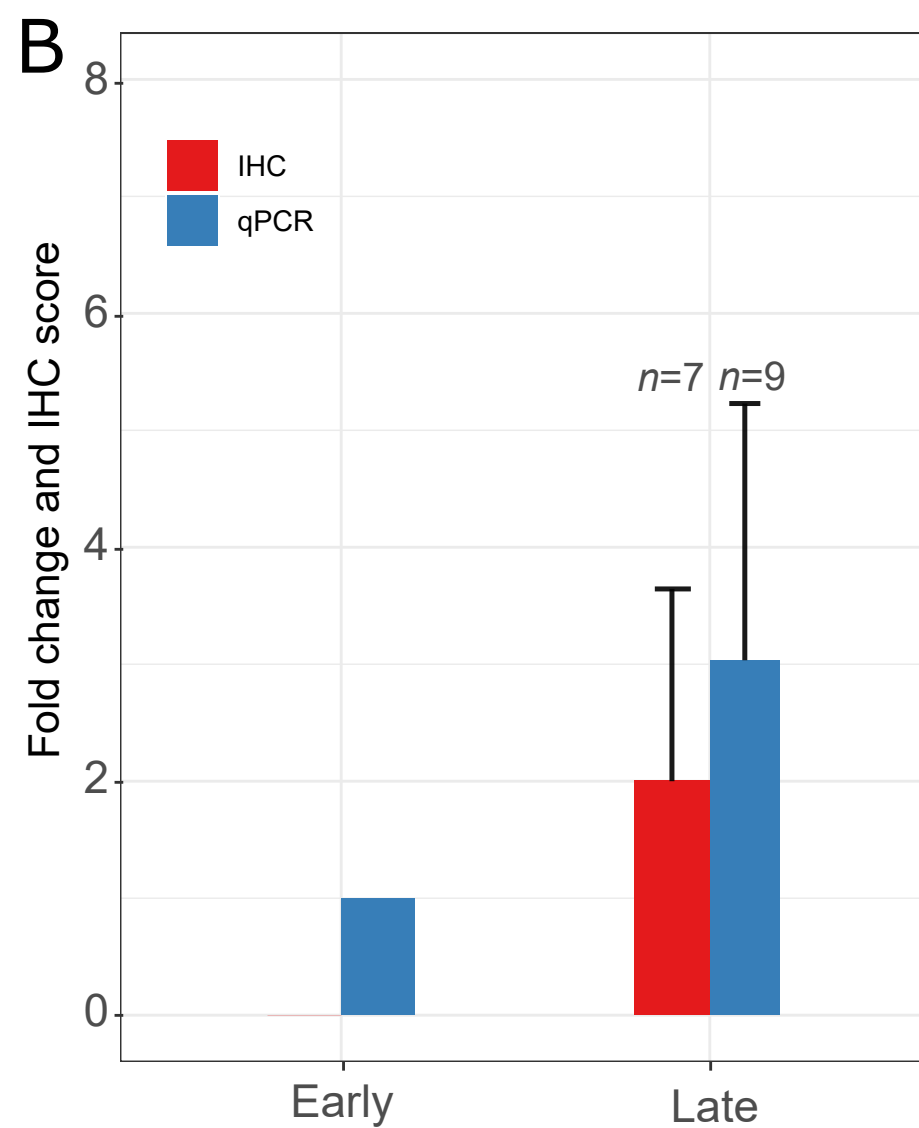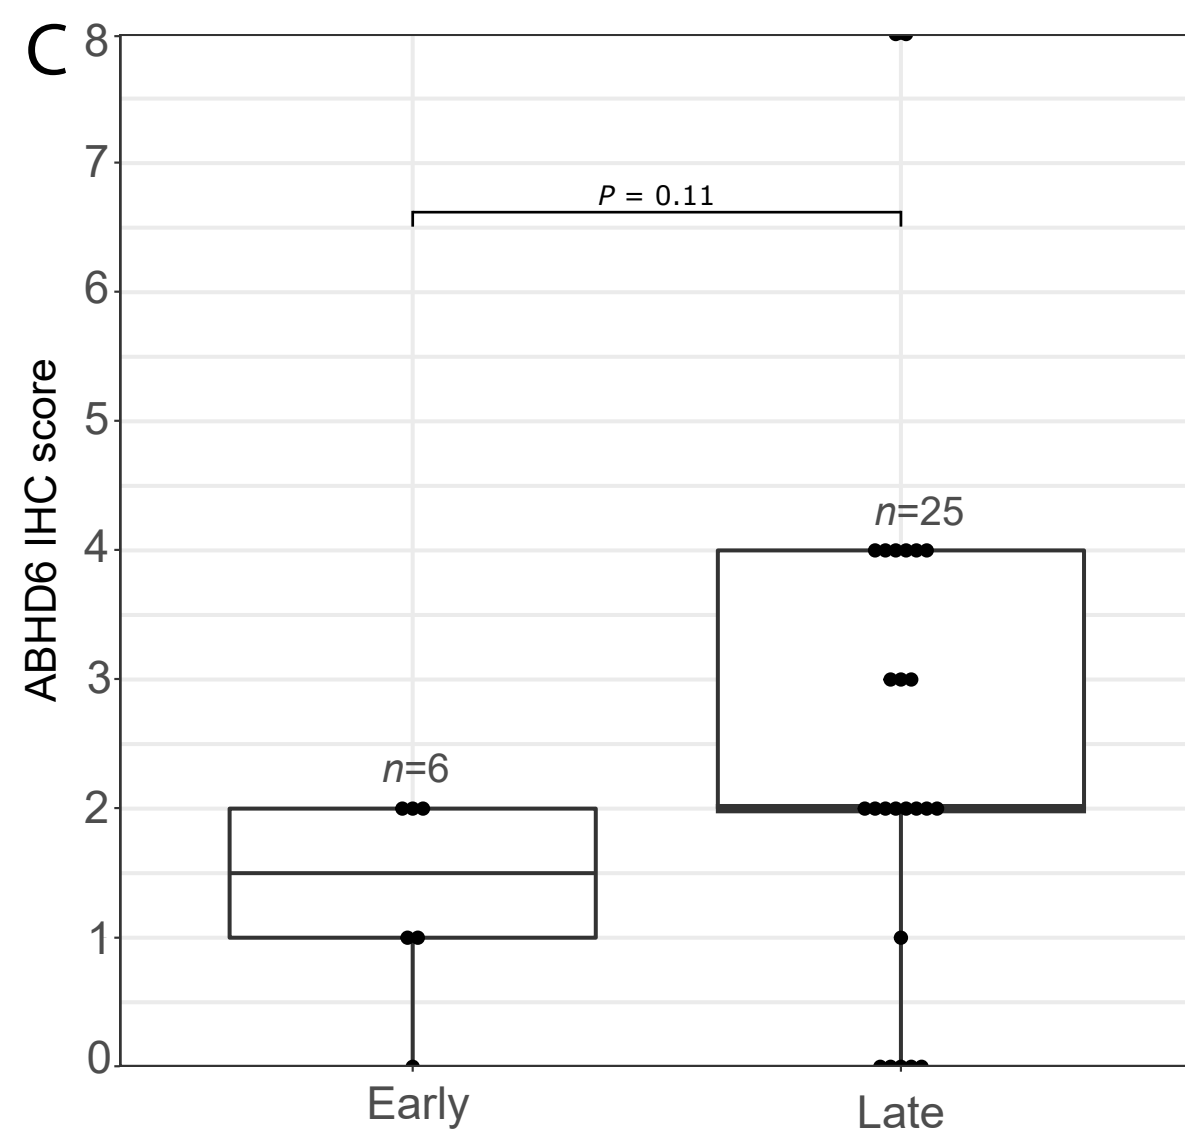

Supplement: s1 [file s1]
